# Supplementary material for: Identification and Expression Analysis of Tubulin Gene Family in Upland Cotton
Source: Research Square preprint supplement (doi:10.21203/rs.3.rs-125041/v1), 2020-12-11
Supplement: Supplementary file 1 [file 0631e20ce89e9e1af4373973.xlsx]

## Sheet: Table 1
Table 1:
Primers	Sequence (5’→3’)	Application
RTGh.A11G258900F	CCTTGTGCCATATCCTCGTATCCA	Gh.A11G258900qRT-PCR forward primer
RTGh.A11G258900R	TAGCAACAGCAGCATTGACATCCT	Gh.A11G258900qRT-PCR reverse primer
RTGh.A03G027200F	TGCTTGCTTACAAGGCTTCCAGAT	Gh.A03G027200qRT-PCR forward primer
RTGh.A03G027200R	GCTCAACCACCGTATCAGACACTT	Gh.A03G027200qRT-PCR reverse primer
RTGh.D03G169300F	CCAACTCAACTCCGATCTCCGAA	Gh.D03G169300qRT-PCR forward primer
RTGh.D03G169300R	AGTGCTCATCTTGCCTCTGAACAT	Gh.D03G169300qRT-PCR reverse primer

## Sheet: Table 2
Table 2:
Gene ID	AA	MW/Kda	PI	Conserved Domains	subcellular Predicted
Gh_A01G086700	415	43370.3	5.62	Tubulin; Tubulin_C	Chloroplast
Gh_A01G115400	452	50650.8	4.74	Tubulin; Tubulin_C	Cytoplasmic
Gh_A01G232800	474	50028.9	5.97	Tubulin; Tubulin_C	Chloroplast
Gh_A02G095500	451	49645	4.92	Tubulin; Tubulin_C	Cytoplasmic
Gh_A03G024100	183	20307.1	4.95	Tubulin_C	Cytoplasmic/Chloroplast
Gh_A03G026900	445	50129.3	4.76	Tubulin; Tubulin_C	Cytoplasmic
Gh_A03G027000	445	50067.3	4.76	Tubulin; Tubulin_C	Cytoplasmic
Gh_A03G027200	444	49882.2	4.85	Tubulin; Tubulin_C	Cytoplasmic
Gh_A03G039400	79	8848.61	4.07	coiled coil	Cytoplasmic/Nuclear
Gh_A03G062000	444	49998.4	4.75	Tubulin; Tubulin_C	Cytoplasmic
Gh_A03G095300	447	50211.6	4.73	Tubulin; Tubulin_C	Cytoplasmic
Gh_A03G209100	450	49540.9	4.93	Tubulin; Tubulin_C	Cytoplasmic
Gh_A04G142400	450	49540.9	4.93	Tubulin; Tubulin_C	Cytoplasmic
Gh_A04G146900	79	8848.61	4.07	coiled coil	Cytoplasmic/Nuclear
Gh_A05G077900	446	50299.7	4.74	Tubulin; Tubulin_C	Cytoplasmic
Gh_A05G097600	445	50012.3	4.76	Tubulin; Tubulin_C	Cytoplasmic
Gh_A05G169500	450	50495.8	4.7	Tubulin; Tubulin_C	Cytoplasmic
Gh_A05G199500	450	49570.9	4.93	Tubulin; Tubulin_C	Cytoplasmic
Gh_A05G241400	449	50656	4.8	Tubulin; Tubulin_C	Cytoplasmic
Gh_A06G003600	449	50390.7	4.79	Tubulin; Tubulin_C	Cytoplasmic
Gh_A06G133600	449	49708.2	4.97	Tubulin; Tubulin_C	Cytoplasmic
Gh_A07G127700	422	47515.5	4.83	Tubulin; Tubulin_C	Cytoplasmic
Gh_A07G206000	326	35336.4	9.4	Tubulin	Chloroplast
Gh_A07G240600	450	49501.9	4.96	Tubulin; Tubulin_C	Cytoplasmic
Gh_A08G009100	351	37644.3	5.14	Tubulin; Tubulin_C	Cytoplasmic
Gh_A08G206600	445	50004.3	4.76	Tubulin; Tubulin_C	Cytoplasmic
Gh_A08G207900	444	49845.2	4.79	Tubulin; Tubulin_C	Cytoplasmic
Gh_A09G049000	448	50592.9	4.68	Tubulin; Tubulin_C	Cytoplasmic
Gh_A09G158800	483	50996.9	5.78	Tubulin; Tubulin_C	Chloroplast
Gh_A09G182300	445	50162.4	4.76	Tubulin; Tubulin_C	Cytoplasmic
Gh_A09G192600	445	49730	4.76	Tubulin; Tubulin_C	Cytoplasmic
Gh_A11G082000	449	49668.2	5.01	Tubulin; Tubulin_C	Cytoplasmic
Gh_A11G102000	474	53228.4	5.61	Tubulin; Tubulin_C	Cytoplasmic/Nuclear
Gh_A11G253100	88	9854.55	9.14		Mitochondrial
Gh_A11G258900	449	49580.2	5	Tubulin; Tubulin_C	Cytoplasmic
Gh_A11G280900	118	13307	7.93		Cytoplasmic/Mitochondrial
Gh_A11G343500	450	49842.5	5.1	Tubulin; Tubulin_C	Cytoplasmic
Gh_A11G351700	447	50298.6	4.75	Tubulin; Tubulin_C	Cytoplasmic
Gh_A11G367700	474	50026.8	6.28	Tubulin; Tubulin_C	Chloroplast
Gh_A12G068700	183	20307.1	4.95	Tubulin_C	Cytoplasmic/Chloroplast
Gh_A12G093400	421	46184.2	5.09	Tubulin; Tubulin_C	Cytoplasmic/Nuclear
Gh_A12G105200	183	20377.2	4.95	Tubulin_C	Cytoplasmic/Chloroplast
Gh_A12G127300	463	52142.1	5.78	Tubulin; Tubulin_C	Cytoplasmic
Gh_A13G154400	414	43205.1	7.75	Tubulin; Tubulin_C	Chloroplast
Gh_A13G236900	449	49734.2	4.89	Tubulin; Tubulin_C	Cytoplasmic
Gh_A13G252700	444	49967.4	4.75	Tubulin; Tubulin_C	Cytoplasmic
Gh_Contig00851G000400	447	50363.7	4.71	Tubulin; Tubulin_C	Cytoplasmic
Gh_D01G082200	414	43256.2	5.44	Tubulin; Tubulin_C	Chloroplast
Gh_D01G112500	452	50705.8	4.68	Tubulin; Tubulin_C	Cytoplasmic
Gh_D01G227200	473	49811.8	6.06	Tubulin; Tubulin_C	Chloroplast
Gh_D02G097200	451	49645.9	4.85	Tubulin; Tubulin_C	Cytoplasmic
Gh_D02G116800	447	50213.5	4.72	Tubulin; Tubulin_C	Cytoplasmic
Gh_D02G226100	450	49614.9	4.89	Tubulin; Tubulin_C	Cytoplasmic
Gh_D03G081400	215	23134.3	8.57	Tubulin	Mitochondrial/Chloroplast
Gh_D03G134700	444	49998.4	4.75	Tubulin; Tubulin_C	Cytoplasmic
Gh_D03G169300	444	49976.2	4.86	Tubulin; Tubulin_C	Cytoplasmic
Gh_D03G169500	445	50097.3	4.76	Tubulin; Tubulin_C	Cytoplasmic
Gh_D03G169600	445	50129.3	4.76	Tubulin; Tubulin_C	Cytoplasmic
Gh_D04G163200	183	20319.1	5.15	Tubulin_C	Cytoplasmic/Chloroplast
Gh_D04G181300	415	45687.5	4.98	Tubulin; Tubulin_C	Cytoplasmic
Gh_D05G089900	446	50212.6	4.7	Tubulin; Tubulin_C	Cytoplasmic
Gh_D05G101900	208	22298.3	8.58	Tubulin	Chloroplast
Gh_D05G109900	446	50141.4	4.74	Tubulin; Tubulin_C	Cytoplasmic
Gh_D05G186400	450	50522.8	4.7	Tubulin; Tubulin_C	Cytoplasmic
Gh_D05G216200	450	49570.9	4.93	Tubulin; Tubulin_C	Cytoplasmic
Gh_D05G257500	117	13469	4.9		Cytoplasmic/Nuclear
Gh_D05G257600	279	31728.9	4.9	Tubulin_C	Nuclear
Gh_D05G318300	124	13853	7.73	Tubulin_C	Chloroplast/Nuclear
Gh_D05G329800	229	25602	4.8	Tubulin_C	Cytoplasmic/Chloroplast
Gh_D06G001200	452	50670.9	4.73	Tubulin; Tubulin_C	Cytoplasmic
Gh_D06G062300	319	35217.7	6.85	coiled coil	Cytoplasmic/Nuclear
Gh_D06G122100	449	49664.2	5.01	Tubulin; Tubulin_C	Cytoplasmic
Gh_D07G126200	447	50262.6	4.77	Tubulin; Tubulin_C	Cytoplasmic
Gh_D07G237900	450	49501.9	4.96	Tubulin; Tubulin_C	Cytoplasmic
Gh_D08G008700	476	50870.7	8.33	Tubulin; Tubulin_C	Mitochondrial/Chloroplast
Gh_D08G056800	229	25557.1	5.29	Tubulin_C	Cytoplasmic/Chloroplast
Gh_D08G101900	196	21613.6	5.14		Chloroplast
Gh_D08G102300	229	25605	4.99	Tubulin_C	Cytoplasmic/Chloroplast
Gh_D08G202200	445	50004.3	4.76	Tubulin; Tubulin_C	Cytoplasmic
Gh_D09G001900	229	25615	4.87	Tubulin_C	Chloroplast
Gh_D09G081300	219	24202.3	6.07		Nuclear
Gh_D09G149500	483	50855.7	5.78	Tubulin; Tubulin_C	Chloroplast
Gh_D09G173700	445	50208.5	4.78	Tubulin; Tubulin_C	Cytoplasmic
Gh_D09G185800	445	49815.1	4.8	Tubulin; Tubulin_C	Cytoplasmic
Gh_D11G082500	449	49698.2	4.97	Tubulin; Tubulin_C	Cytoplasmic
Gh_D11G102600	473	53143.3	5.62	Tubulin; Tubulin_C	Cytoplasmic/Nuclear
Gh_D11G263200	452	49836.3	4.91	Tubulin; Tubulin_C	Cytoplasmic
Gh_D11G274400	196	21594.6	5.13		Chloroplast
Gh_D11G348000	450	49873.5	5.1	Tubulin; Tubulin_C	Cytoplasmic
Gh_D11G355300	447	50298.6	4.75	Tubulin; Tubulin_C	Cytoplasmic
Gh_D11G375800	499	52870.2	6.94	Tubulin; Tubulin_C	Chloroplast
Gh_D12G088700	391	42985.3	4.89	Tubulin; Tubulin_C	Cytoplasmic
Gh_D12G127200	474	53239.3	5.67	Tubulin; Tubulin_C	Cytoplasmic/Nuclear
Gh_D13G116100	449	49670.3	5	Tubulin; Tubulin_C	Cytoplasmic
Gh_D13G157200	414	43262.2	6.78	Tubulin; Tubulin_C	Chloroplast
Gh_D13G174600	124	13840.9	7.73	Tubulin_C	Chloroplast/Nuclear
Gh_D13G239900	449	49734.2	4.89	Tubulin; Tubulin_C	Cytoplasmic
Gh_D13G257100	444	49953.3	4.75	Tubulin; Tubulin_C	Cytoplasmic
